# Supplementary material
Source: PubMed Central journal article supplement (PMC3336102)
Supplement: NIHMS355058-supplement-1.pdf [file NIHMS355058-supplement-1.pdf]

## Supplemental Materials

### METHODS

**Mice.** Male ApoE<sup>-/-</sup> mice (B6.129P2-ApoE<sup>tm1Unc</sup>/J) were purchased from The Jackson Laboratory (Bar Harbor) and were fed *ad libitum* with standard chow diet until surgery at 8 to 9 weeks of age. The ApoE<sup>tm1Unc</sup> mutation was from a 129P2/OlaHsd-derived E14Tg2a embryonic stem cell line and was backcrossed to the C57BL/6J for 10 generations.

**Partial carotid ligation surgery.** Partial carotid ligation surgeries were performed as previously described<sup>1, 2</sup>. Mice were anesthetized by intra-peritoneal injection of a mixture of xylazine (10 mg/kg) and ketamine (80 mg/kg). The surgical site was epilated, disinfected with Betadine, and a ventral mid-line incision (4 to 5 mm in length) was made in the neck using micro-scissors. The LCA bifurcation was exposed by blunt dissection and three of four caudal LCA branches (left external carotid, internal carotid, and occipital arteries) were carefully dissected free of surrounding connective tissue and ligated with 6-0 silk sutures, leaving the superior thyroid artery intact. The surgical incision was then closed with Tissue-Mend (Veterinary Product Laboratories), and mice were monitored until recovery in a chamber under a heating lamp. Following partial carotid ligation, ApoE<sup>-/-</sup> mice were maintained for 4 to 28 days on the Paigen's high-fat diet (HFD; Science Diets) containing 1.25% cholesterol, 15% fat, and 0.5% cholic acid<sup>3</sup>. In some studies, sham-ligated animals were operated on as described above except the ligating sutures were not tightened to impede blood flow.

**Cells.** For flow cytometry analyses of vascular wall leukocytes, partially-ligated male ApoE<sup>-/-</sup> mice maintained on HFD were sacrificed by CO<sub>2</sub> inhalation and perfused by

cardiac puncture with saline containing 10 U/ml of heparin at 4 days (n=12), 7 days (n=12), 14 days (n=12), 21 days (n=12) and 28 days (n=15) post-ligation. Additionally, sham-ligated ApoE<sup>-/-</sup> mice (n=9) were fed HFD and sacrificed at 7 days post-surgery. Following sacrifice, LCA and RCA were dissected free of surrounding connective tissue and perivascular fat with care taken not to disrupt associated adventitial tissues and excised by using micro-scissors to cut ~1mm below the carotid bifurcation and ~1 mm above the aortic arch. Leukocytes were isolated as previously described<sup>4</sup>. Excised arteries were placed in ~2 ml of chilled Hanks balanced salt solution, and then pooled (n=3) in 1.5 ml microcentrifuge tubes in 1 ml of chilled digestion buffer consisting of 450 U/ml collagenase I-S, 125 U/ml collagenase XI, 60 U/ml hyaluronidase (Sigma-Aldrich), and 60 U/ml DNase I (Applichem) in phosphate buffered saline (PBS) supplemented with calcium and magnesium. Pooled arteries were minced finely for 5-10 min using sharp dissection scissors, transferred to a 12-well flat-bottom tissue culture dish, and digested at 37°C for 1 hour at 5% CO<sub>2</sub>, with gentle shaking every 15 min. Single cell suspensions were obtained by shearing the digested arteries with a 21½ gauge needle 8-10 times. Cells were transferred to 5 ml FACS tubes (BD Biosciences), washed once in PBS without calcium and magnesium (10 min, 500 g, 4°C) and resuspended in 1 ml PBS for staining.

**Flow cytometry.** Single cell suspensions from pooled carotid artery samples or peripheral blood were incubated for 30 min on ice with Fixable Live/Dead Yellow stain (Invitrogen) to discriminate dead cells, washed once (10 min, 500 g, 4°C) in chilled FACS buffer (PBS supplemented with 0.5% bovine serum albumin), and incubated for 10 min on ice with FC Block (2.4G2, BD Biosciences) to prevent nonspecific binding of FC receptors in tissue. Blocked samples were then incubated (30 min, on ice, in dark) with a cocktail containing CD45-biotin (30-F11), CD8a-V450 (53-6.7), CD11c-V450

(HL3), CD4-FITC (RM4-4), Gr-1-FITC (RB6-8C5), CD49b-PE (DX5), NK1.1-PE (PK136), CD3e-PerCP-Cy5.5 (145-2C11), and CD11b-APC-Cy7 (M1/70) monoclonal antibodies (mAb) from BD Biosciences; CD19-PE-Texas Red (6D5) from Invitrogen; and F4/80-PE-Cy7 (BM8) and MHCII-APC (M5/114.15.2) mAb from eBioscience. After staining, cells were washed in chilled FACS buffer, stained with streptavidin-conjugated Qdot 655 (Invitrogen) for 30 min on ice, washed in chilled FACS buffer, and resuspended in BD Stabilizing Fixative (BD Biosciences). Immunofluorescence was detected using a LSR II flow cytometer (BD Immunocytometry Systems) equipped with a 488 nm blue laser, 633 nm red laser, and 405 nm violet laser and set using custom filter settings as follows. Live/Dead Yellow stain was excited using the 405 nm violet laser and detected using a 560/40 dichroic filter with a 550 nm long-pass filter. Qdot 655 fluorescence was excited using the 405 nm violet laser and detected using a 660/20 dichroic filter with a 640 nm long-pass filter. Lastly, to reduce Qdot 655 spillover, a 712/20 dichroic filter with a 685 nm long-pass filter was used to detect PerCP-Cy5.5 fluorescence. In order to determine absolute cell numbers per sample, 50  $\mu$ l of AccuCount Ultra Rainbow Fluorescent Particles (Spherotech, Inc.) were added to each sample immediately prior to flow cytometry.

**Compensation for flow cytometry analyses.** Compensation was performed to account for fluorescence spillover of each fluorochrome into multiple detection channels. Anti-rat/hamster IgG-kappa compensation beads (BD Biosciences) were incubated with individual stains of CD8a-V450, CD4-FITC, CD49b-PE, CD19-PE Texas Red, CD3e-PerCP-Cy5.5, F4/80-PE-Cy7, MHCII-APC, and CD11b-APC-Cy7. Single color controls for CD45-Qdot 655 were performed by incubating compensation beads with anti-CD45-biotinylated Ab, followed by streptavidin-conjugated Qdot 655 (Invitrogen). For Live/Dead Yellow compensation,  $5 \times 10^5$  splenocytes were heat-killed by incubation at

50°C for 30 min and pooled with  $5 \times 10^5$  fresh splenocytes in 1 ml chilled PBS and stained with 1  $\mu$ l of Live/Dead Yellow (30 min, on ice). In addition to bead-based compensation, populations of fresh and digested splenocytes were single-stained with each individual marker in the panel in order to properly set fluorochrome channel voltages to accommodate adequate signal-to-noise ratios for all cell markers/cell types typed in the panel, and to validate each antibody/fluorochrome pairing for use with digestion<sup>4</sup>. FlowJo analysis software (ver5.0; Tree Star, Inc.) was used to automatically generate an initial compensation matrix using bead-compensated samples. The initial compensation matrix was then manually readjusted using freshly prepared single-stained splenocytes in order to accommodate optimal discrimination of diverse leukocyte populations bearing different auto-fluorescent properties and avoid unnecessary over-compensation artifacts. Lastly, gating strategies were determined using fluorescence minus one (FMO) techniques in which populations of fresh and digested splenocytes were stained with 13 different FMO panels, each lacking one out of the 13 different panel markers (Supplemental Fig. 1). This strategy properly accounts for out-of-channel fluorescence as well as any unavoidable compensation artifacts that may remain when determining positive and negative lineage gates<sup>5-7</sup>.

**Gating strategy for flow cytometry analyses.** Splenocytes, peripheral blood leukocytes, or digested arterial wall cells obtained from ApoE<sup>-/-</sup> mice were incubated with a cell viability marker, followed by 12 different antibodies against cell surface lineage markers and analyzed by flow cytometry (Fig, 1D). Initially, single cell populations were gated based on forward scatter characteristics using FlowJo analysis software (1). Accucount beads were added immediately prior to flow analysis to allow quantification of cell numbers per sample and separated from cells based on ultra-bright fluorescence (2). Live cells were distinguished from dead or damaged cells using a fixable cell

viability stain (Live/Dead Yellow) to substantially reduce background signal (3). Pan-leukocyte anti-CD45 was used to identify leukocytes and filter out non-leukocytic vascular cells such as endothelial cells and vascular smooth muscle cells (4). CD45<sup>+</sup> leukocytes were gated into three fractions using anti-CD3 and anti-CD19 coupled to non-overlapping fluorochromes (PerCP-Cy5.5 and PE-Texas Red) to identify T- and B-lymphocytes, and non-lymphocytes (CD3e<sup>-</sup>CD19<sup>-</sup>), respectively (6). Gated cells of the T-lymphocyte (CD3e<sup>+</sup>) and non-lymphocyte fractions were both labeled with antibodies coupled to FITC and V450. The CD3e<sup>+</sup> fraction was divided into CD4<sup>+</sup> or CD8<sup>+</sup> T-cells using CD4-FITC and CD8a-V450 (6a). Non-lymphocytes (CD3e<sup>-</sup>CD19<sup>-</sup>) were designated as granulocytes using Gr-1 (anti-Ly-6G/Ly-6C)-FITC and NK cells identified using NK1.1 and anti-CD49b coupled to PE (7). Among the remaining myeloid cells, dendritic cells (DCs) were defined as MHCII<sup>+</sup>CD11c<sup>+</sup> events using MHCII-APC and CD11c-V450 (8). Monocyte/macrophages were identified using antibodies to the pan-monocyte markers F4/80 coupled to PE-Cy7 and CD11b coupled to APC-Cy7 (F4/80<sup>+/-</sup>CD11b<sup>+</sup>) (9). The coupling of multiple antibodies to a single fluorochrome was used only when “stacked” markers could be discriminated by a third, independent marker on a different channel (such as CD3e-PerCP-Cy5.5). Cell counts for each cell type and for AccuCount beads were calculated by FlowJo software and absolute cell count per carotid artery was determined using the following equation:  $((A/B) \times (C/D)) \times 40$ , where A = number of cells recorded for the test sample, B = number of AccuCount beads recorded, C = number of AccuCount beads per 50 $\mu$ l (50,000), and D = volume of test sample in  $\mu$ l. Quantification of excluded CD45<sup>+</sup> leukocytes was performed using the alternate gating strategy shown in Supplemental Figure IV.

**Immunostaining and TUNEL assays.** Mice were euthanized and perfused with saline containing heparin as described above. LCA and RCA were collected *en bloc* along with

the heart, aortic arch, trachea, esophagus, and surrounding fat tissue as previously described<sup>2</sup>. Tissue was embedded in optimal cutting temperature (OCT) compound (Tissue-Tek), frozen on liquid nitrogen and stored at  $-80^{\circ}\text{C}$  until used. Frozen sections were made starting from the level of the right subclavian artery bifurcation, 300  $\mu\text{m}$  was trimmed away and three sets of ten consecutive 7  $\mu\text{m}$  thick sections were taken at 300  $\mu\text{m}$  intervals constituting the 'proximal' and 'middle' portions of the artery.

Sections were fixed in chilled 4% paraformaldehyde in PBS or a 1:1 mixture of methanol/acetone for 10 min and then blocked (1 hr, at RT) using 0.1% (w/v) BSA or 10% (v/v) goat or donkey serum in PBS. Staining for vascular wall leukocytes was performed overnight at  $4^{\circ}\text{C}$  in a humidified chamber using the following primary antibodies: biotinylated anti-CD45.2 mAb for total leukocytes (104; eBioscience); biotinylated anti-CD11c for DCs (HL3; BD Biosciences); rat anti-mouse CD3 antibody for total T-cells (KT3; ABD Serotec); rat anti-mouse CD68 for macrophages/foam cells (FA-11; ABD Serotec); rat anti-mouse CD11b for myeloid cells/macrophages (M1/70; Abcam); and polyclonal rabbit anti-mouse  $\alpha\text{SMA}$  for smooth muscle cells (Thermo Scientific). Isotype controls were performed using biotinylated Armenian Hamster IgG (eBio299Arm; eBioscience), biotinylated rat IgG2a, and purified rat IgG2a and IgG2b isotype control Ab (AbD Serotec). Secondary staining was performed using streptavidin-conjugated rhodamine red X (RRX; Invitrogen), DyLight 549-conjugated donkey anti-rat, DyLight 549-conjugated donkey anti-rabbit, streptavidin-conjugated DyLight 549, or RRX-conjugated goat anti-rat secondary antibodies (Jackson Immunoresearch).

*In situ* apoptosis was measured in cryosections of LCA and RCA using the TUNEL-TMR *In Situ* Cell Death Detection Kit (Roche Applied Science) according to the manufacturer's protocol. In short, freshly thawed cryosections were fixed in 4%

paraformaldehyde in PBS for 20 min at RT and then washed in PBS for 30 min at RT. After 2 more 5 min washes in PBS, 50  $\mu$ l of TUNEL reaction mixture (TdT enzyme solution with tetramethylrhodamine-dUTP (TMR) labeling solution) was added to the tissue sections and sections were incubated in the dark in a humidified chamber at 37°C for 60 min. Positive control assays were performed by incubating sections in recombinant DNase I for 10 min at RT prior to incubation with the TUNEL reaction mixture. For negative control assays, only TMR labeling solution (without TdT enzyme) was added during incubation with the TUNEL reaction mixture.

Antibody- and TUNEL-stained sections were mounted with Prolong Gold antifade mounting medium with DAPI (Invitrogen). Immunofluorescence stains were imaged using a Zeiss Axioskop 2 Plus fluorescence microscope (Carl Zeiss, Inc.) mounted with a Zeiss Axiocam camera (Carl Zeiss, Inc.). All images were captured with a 40x objective lens using the AxioVision 4 software (Carl Zeiss, Inc.) and modified post-capture to balance brightness and contrast independently for each channel using the AxioVision 4 software, followed by uniform leveling of signal brightness in each color channel using Adobe Photoshop (Adobe Systems, Inc.).

**Quantitative analysis of immunofluorescence staining.** Frozen cross-sections of LCA and RCA immunostained for CD45 (leukocytes),  $\alpha$ SMA (SMCs), and by TUNEL assay (apoptosis) were counterstained with DAPI to identify nuclei as described above. Total DAPI<sup>+</sup> nuclei and CD45<sup>+</sup>,  $\alpha$ SMA<sup>+</sup>, or TUNEL<sup>+</sup> nuclei per artery were quantified for samples obtained 7 days (n=7, from 28 images per stain), 14 days (n=6, from 24 images per stain), and 21 days (n=7, from 28 images per stain) post-ligation using Image J software (NIH). Stains were quantified for additional sham-ligated animals (n=3, from 12

images). For  $\alpha$ SMA-stained samples, only intimal nuclei were counted, while intimal, medial, and adventitial nuclei were counted for CD45 and TUNEL stains. The ratio of positive staining nuclei to total DAPI<sup>+</sup> nuclei was calculated for all images.

**PCR array assay and analysis.** LCA and RCA from partially ligated ApoE<sup>-/-</sup> mice at 4 (n=4), 7 (n=4) or 14 (n=3) days post-ligation were excised as described above and snap frozen in liquid nitrogen. Frozen carotids were then ground by mortar and pestle in 700  $\mu$ l of Qiazol Lysis Reagent (Qiagen) and total RNA was extracted using the miRNeasy Mini Kit (Qiagen) according to the manufacturer's protocol. cDNA was synthesized using SuperScript III First-Strand Synthesis SuperMix (Invitrogen) according to the manufacturer's protocol. Expression levels of inflammatory cytokine and chemokine genes and their receptors were measured in cDNAs using RT<sup>2</sup> Profiler PCR arrays (SA Biosciences) for inflammatory cytokines & receptors as per manufacturer's protocols and run on a Step-One Plus real time PCR system (Applied Biosystems). Additional qPCR was performed on the same RNA samples as the PCR arrays for *Ifng*, *Tbx21*, *Gata3*, *Rorc*, and *Foxp3* genes using the following primer pairs: *Ifng* (forward 5'-AAC-AAC-CCA-CAG-GTC-CAG-CGC-3'; reverse 5'-CCA-CCC-CGA-ATC-AGC-AGC-GA-3'), *Tbx21* (forward 5'-ATA-CGA-GTG-TCC-CCT-CGC-CAC-C-3'; reverse 5'-CCG-AGG-TGT-CCC-CAG-CCA-GTA-A-3'), *Gata3* (forward 5'-GTG-CCC-GAG-TAC-AGC-TCT-GGA-CT-3'; reverse 5'-AGA-GTC-CGC-AGG-CAT-TGC-AAA-GG-3'), *Rorc* (forward 5'-CCT-TGG-GTG-GCA-GCT-TGG-CTA-GG-3'; reverse 5'-CTT-TTC-CCA-CTT-CCT-CAG-CGC-CC-3'), and *Foxp3* (forward 5'-CAG-CTG-CCT-ACA-GTG-CCC-CTA-GT-3'; reverse 5'-AGG-TGG-TGG-GAG-GCT-GAT-CAT-GG-3'). PCR array data were processed using Microsoft Excel-based RT<sup>2</sup> Profiler PCR Array Data Analysis templates provided by the manufacturer (SA Biosciences). Because housekeeping gene expression increased with lesion development, total copy number per artery was calculated in LCA and RCA



for each target gene and centered to the geometric mean Ct of RCA for all time points using the following equation:  $100 / 2^{(\text{sample Ct} - \text{mean RCA Ct})}$ .

**Cytokine bead array (CBA) ELISA assay.** LCA and RCA from partially ligated ApoE<sup>-/-</sup> mice were excised as described above and cultured overnight in 60  $\mu$ l of DMEM supplemented with 10% fetal calf serum, 100 U/mL penicillin, and 100  $\mu$ g/mL streptomycin at 37°C in 5% CO<sub>2</sub> as previously described<sup>8</sup>. During this time, vascular cytokine production was stimulated by adding 12-O-tetradecanoylphorbol-13-acetate (TPA, 10  $\mu$ mol/L) and ionomycin (2  $\mu$ mol/L; Cell Signaling Technology) to the tissue culture medium. Following incubation, levels of cytokines TNF $\alpha$ , IFN $\gamma$ , IL-2, IL-4, and IL-5 were measured using the cytokine bead array ELISA kit (BD Biosciences; San Jose, CA) according to manufacturer's protocol. Cytokine levels were detected using a LSR II flow cytometer (BD Immunocytometry Systems). CBA array data were processed using FCAP Array software (Soft Flow, Inc.). The theoretical limit of detection for the cytokines measured was 5.0 pg/ml (IL-2), 5.0 pg/ml (IL-4), 5.0 pg/ml (IL-5), 2.5 pg/ml (IFN- $\gamma$ ), and 6.3 pg/ml (TNF $\alpha$ ).

**Partial least squares regression (PLSR) modeling analysis.** To extract relationships between changes in gene expression and cell infiltration dynamics over the time course of flow-disturbed atherosclerosis, a multivariate analysis method, partial least squares regression (PLSR), was applied to the quantitative flow cytometry and PCR array data collected at days 4, 7, and 14 post-ligation. This technique is useful for extracting relationships across multiple types of quantitative data and multiple treatment conditions and has been successfully used to derive information for signal transduction network features<sup>9</sup>, viral infection<sup>10</sup>, and cell fate decisions<sup>11-13</sup>. The algorithm finds an optimal set

of “latent variables”, or principal components, that best captures the variance in the data through a linear combination of the X-variables (qPCR raw Ct values), as well as optimizing the regression to a dependent Y-variable set (number of immune cells counted by flow cytometry).

The multivariate analysis was performed as previously described<sup>14</sup>. Briefly, an  $m \times n$  data matrix was created where  $m=97$  represents the concatenated columns of each mRNA evaluated by qPCR (X-variables) along with flow cytometry values (Y-variables), and  $n=28$  rows represent the “observations”, individual samples collected at each day in LCA or RCA. The matrix was pre-processed by log transformation to achieve normal distributions of observations, then mean-centered and unit-variance scaled to prevent biasing of the variables in the model. Models were generated using SIMCA-P software (Umetrics) and evaluated based upon the variance captured ( $Q^2$  value) and goodness of fit ( $R^2Y$ ). Genes that were statistically insignificant in a given component were trimmed from the model, which further enhanced the regression fit.

**Statistical analysis.** Values are expressed as mean $\pm$ SEM unless otherwise indicated. Pairwise comparisons were performed using one-way or two-way t-tests. Multiple comparisons of means were performed using 1-way ANOVA followed by Tukey’s Multiple Comparison tests. Differences between groups were considered significant at P values below 0.05. All statistical analyses were performed using Prism software (GraphPad Software).

## SUPPLEMENTAL DATA

**Supplemental Table I.** Time course analyses of dynamic leukocyte accumulation in flow-disturbed LCA

| Comparison      | Mean Diff. | q    | Significant? |         | ANOVA   |
|-----------------|------------|------|--------------|---------|---------|
|                 |            |      | P<0.05?      | Summary | P value |
| Leukocytes      |            |      |              |         | 0.0002  |
| 4v7             | 86.78      | 8.56 | Yes          | ***     |         |
| 7v14            | -63.19     | 6.23 | Yes          | **      |         |
| 7v21            | -70.19     | 6.92 | Yes          | **      |         |
| 7v28            | -63.11     | 6.56 | Yes          | **      |         |
| B-cells         |            |      |              |         | 0.0249  |
| 4v7             | 0.32       | 1.01 | No           | ns      |         |
| 7v14            | 0.49       | 1.54 | No           | ns      |         |
| 7v21            | 1.31       | 4.11 | No           | ns      |         |
| 7v28            | 0.33       | 1.09 | No           | ns      |         |
| T-cells         |            |      |              |         | 0.0350  |
| 4v7             | 2.90       | 5.11 | Yes          | *       |         |
| 7v14            | -1.29      | 2.28 | No           | ns      |         |
| 7v21            | -1.12      | 1.98 | No           | ns      |         |
| 7v28            | -1.60      | 2.98 | No           | ns      |         |
| Dendritic Cells |            |      |              |         | 0.0012  |
| 4v7             | 20.38      | 7.30 | Yes          | ***     |         |
| 7v14            | -12.87     | 4.61 | Yes          | *       |         |
| 7v21            | -16.13     | 5.77 | Yes          | **      |         |

|                      |        |      |     |     |         |
|----------------------|--------|------|-----|-----|---------|
| 7v28                 | -14.92 | 5.63 | Yes | **  |         |
| NK Cells             |        |      |     |     | 0.0040  |
| 4v7                  | 5.24   | 6.13 | Yes | **  |         |
| 7v14                 | -3.08  | 3.61 | No  | ns  |         |
| 7v21                 | -3.29  | 3.86 | No  | ns  |         |
| 7v28                 | -4.75  | 5.86 | Yes | **  |         |
| Monocyte/Macrophages |        |      |     |     | <0.0001 |
| 4v7                  | 48.76  | 9.24 | Yes | *** |         |
| 7v14                 | -41.82 | 7.93 | Yes | *** |         |
| 7v21                 | -44.54 | 8.44 | Yes | *** |         |
| 7v28                 | -37.48 | 7.49 | Yes | *** |         |
| Granulocytes         |        |      |     |     | 0.0298  |
| 4v7                  | 2.54   | 4.11 | No  | ns  |         |
| 7v14                 | -0.58  | 0.93 | No  | ns  |         |
| 7v21                 | -2.18  | 3.54 | No  | ns  |         |
| 7v28                 | -0.37  | 0.63 | No  | ns  |         |

**Supplemental Table II.** PCR array of cytokines and chemokines expressed in LCA and RCA, and their known functions.

**A. 7 day post-ligation**

| <b>Gene Symbol</b>            | <b>Gene Name</b>                  | <b>Fold Change (LCA/RCA)</b> | <b>p value</b> | <b>Function</b>                                          |
|-------------------------------|-----------------------------------|------------------------------|----------------|----------------------------------------------------------|
| <b><u>Chemokine Genes</u></b> |                                   |                              |                |                                                          |
| <i>Ccl2</i>                   | chemokine (C-C motif) ligand 2    | 138.19                       | 0.0169         | <b>Attracts:</b> monocytes, memory T-cells, DCs          |
| <i>Ccl7</i>                   | chemokine (C-C motif) ligand 7    | 107.47                       | 0.0476         | <b>Attracts:</b> monocytes<br><b>Activates:</b> macs     |
| <i>Ccl5</i>                   | chemokine (C-C motif) ligand 5    | 38.06                        | 0.0250         | <b>Attracts:</b> T-cells<br><b>Activates:</b> NK cells   |
| <i>Cxcl12</i>                 | chemokine (C-X-C motif) ligand 12 | 34.26                        | 0.0123         | <b>Attracts:</b> lymphocytes                             |
| <i>Ccl12</i>                  | chemokine (C-C motif) ligand 12   | 32.06                        | 0.0275         | <b>Attracts:</b> monocytes, lymphocytes                  |
| <i>Ccl6</i>                   | chemokine (C-C motif) ligand 6    | 31.55                        | 0.0427         | <b>Expressed by:</b> neutrophils, macs                   |
| <i>Cxcl9</i>                  | chemokine (C-X-C motif) ligand 9  | 19.51                        | 0.0310         | <b>Attracts:</b> T-cells                                 |
| <i>Ccl22</i>                  | chemokine (C-C motif) ligand 22   | 12.07                        | 0.0030         | <b>Expressed by:</b> macrophages, DCs                    |
| <i>Ccl19</i>                  | chemokine (C-C motif) ligand 19   | 11.55                        | 0.0481         | <b>Attracts:</b> B-cells, CCR7 <sup>+</sup> T-cells, DCs |

|               |                                      |       |        |                                                                  |
|---------------|--------------------------------------|-------|--------|------------------------------------------------------------------|
| <i>Ccl9</i>   | chemokine (C-C motif) ligand<br>9    | 10.71 | 0.0230 | <b>Attracts:</b> CD11b <sup>+</sup> DCs                          |
| <i>Cx3cl1</i> | chemokine (C-X3-C motif)<br>ligand 1 | 10.26 | 0.0210 | <b>Attracts:</b> T-cells,<br>monocytes, DCs                      |
| <i>Cxcl10</i> | chemokine (C-X-C motif)<br>ligand 10 | 10.25 | 0.0405 | <b>Attracts:</b> monocytes,<br>T-cells, NK cells, DCs            |
| <i>Ccl4</i>   | chemokine (C-C motif) ligand<br>4    | 9.78  | 0.0034 | <b>Attracts:</b> monocytes,<br>NK cells                          |
| <i>Ccl3</i>   | chemokine (C-C motif) ligand<br>3    | 9.43  | 0.0002 | <b>Attracts:</b> neutrophils                                     |
| <i>Ccl24</i>  | chemokine (C-C motif) ligand<br>24   | 3.50  | 0.0242 | <b>Attracts:</b> eosinophils,<br>resting T-cells,<br>neutrophils |
| <i>Ccl1</i>   | chemokine (C-C motif) ligand<br>1    | 2.33  | 0.0137 | <b>Attracts:</b> monocytes,<br>NK cells, immature B-<br>cells    |

### **Chemokine Receptor Genes**

|              |                                       |       |        |                                                  |
|--------------|---------------------------------------|-------|--------|--------------------------------------------------|
| <i>Ccr5</i>  | chemokine (C-C motif)<br>receptor 5   | 95.85 | 0.0305 | <b>Binds:</b> CCL5, CCL3,<br>CCL4                |
| <i>Ccr3</i>  | chemokine (C-C motif)<br>receptor 3   | 93.04 | 0.0377 | <b>Binds:</b> CCL11, CCL26,<br>CCL7, CCL13, CCL5 |
| <i>Ccr2</i>  | chemokine (C-C motif)<br>receptor 2   | 57.08 | 0.0497 | <b>Binds:</b> CCL2                               |
| <i>Cxcr3</i> | chemokine (C-X-C motif)<br>receptor 3 | 13.35 | 0.0026 | <b>Binds:</b> CXCL9,<br>CXCL10, CXCL11,          |

|              |                                       |       |        |                                                     |
|--------------|---------------------------------------|-------|--------|-----------------------------------------------------|
|              |                                       |       |        | CXCL4                                               |
| <i>Cxcr2</i> | chemokine (C-X-C motif)<br>receptor 2 | 11.64 | 0.0286 | <b>Binds:</b> IL8, CXCL1,<br>CXCL2, CXCL3,<br>CXCL5 |
| <i>Cxcr4</i> | chemokine (C-X-C motif)<br>receptor 4 | 10.39 | 0.0258 | <b>Binds:</b> CXCL12                                |
| <i>Ccr9</i>  | chemokine (C-C motif)<br>receptor 9   | 7.27  | 0.0082 | <b>Binds:</b> CCL25                                 |
| <i>Ccr7</i>  | chemokine (C-C motif)<br>receptor 7   | 6.51  | 0.0243 | <b>Binds:</b> CCL19                                 |
| <i>Ccr6</i>  | chemokine (C-C motif)<br>receptor 6   | 6.13  | 0.0122 | <b>Binds:</b> CCL20                                 |

### **Cytokine Genes**

|              |                                                                               |       |        |                                                                                                      |
|--------------|-------------------------------------------------------------------------------|-------|--------|------------------------------------------------------------------------------------------------------|
| <i>Mif</i>   | macrophage migration<br>inhibitory factor                                     | 30.23 | 0.0236 | Macrophage fx                                                                                        |
| <i>Tgfb1</i> | transforming growth factor,<br>beta 1                                         | 16.39 | 0.0052 | Anti-inflammatory                                                                                    |
| <i>Il1a</i>  | interleukin 1 alpha                                                           | 13.32 | 0.0001 | Pro-inflammatory                                                                                     |
| <i>Aimp1</i> | aminoacyl tRNA synthetase<br>complex-interacting<br>multifunctional protein 1 | 10.91 | 0.0336 | Pro-inflammatory                                                                                     |
| <i>Il16</i>  | interleukin 16                                                                | 10.03 | 0.0258 | T-cell activation<br><b>Attracts:</b> activated<br>CD4 <sup>+</sup> T-cells, CD4 <sup>+</sup><br>DCs |

|              |                                   |      |        |                                                       |
|--------------|-----------------------------------|------|--------|-------------------------------------------------------|
| <i>Il18</i>  | interleukin 18                    | 8.81 | 0.0030 | Pro-inflammatory                                      |
| <i>Il1f6</i> | interleukin 1 family, member<br>6 | 4.95 | 0.0170 | ?<br><br>NK cell activation /                         |
| <i>Il15</i>  | interleukin 15                    | 4.86 | 0.0312 | proliferation;<br>homeostatic T-cell<br>proliferation |
| <i>Tnf</i>   | tumor necrosis factor             | 4.35 | 0.0390 | Pro-inflammatory                                      |
| <i>Il4</i>   | interleukin 4                     | 4.26 | 0.0298 | Th2 T-cell<br>differentiation                         |
| <i>Il1f8</i> | interleukin 1 family, member<br>8 | 4.08 | 0.0271 | ?                                                     |
| <i>Il11</i>  | interleukin 11                    | 3.65 | 0.0299 | Platelet production;<br>lymphopoiesis                 |
| <i>Il13</i>  | interleukin 13                    | 2.68 | 0.0425 | Allergic inflammation                                 |

### **Cytokine Receptor Genes**

|                |                                        |        |        |                                                                                      |
|----------------|----------------------------------------|--------|--------|--------------------------------------------------------------------------------------|
| <i>Il2rg</i>   | interleukin 2 receptor,<br>gamma chain | 104.87 | 0.0008 | Common $\gamma$ -chain<br>subunit for IL2, IL4, IL7,<br>IL9, IL15, IL21<br>receptors |
| <i>Il10ra</i>  | interleukin 10 receptor, alpha         | 72.15  | 0.0067 | Subunit of IL10<br>receptor                                                          |
| <i>Il13ra1</i> | interleukin 13 receptor, alpha<br>1    | 31.21  | 0.0064 | Common subunit for<br>IL13 and IL4 receptors                                         |
| <i>Il10rb</i>  | interleukin 10 receptor, beta          | 25.30  | 0.0016 | Subunit of IL10                                                                      |



|                 |                                                          |       |        |                        |
|-----------------|----------------------------------------------------------|-------|--------|------------------------|
|                 |                                                          |       |        | receptor               |
| <i>Il6st</i>    | interleukin 6 signal transducer<br>tumor necrosis factor | 19.63 | 0.0131 |                        |
| <i>Tnfrsf1a</i> | receptor superfamily, member 1a                          | 14.78 | 0.0221 | TNF receptor           |
| <i>Il2rb</i>    | interleukin 2 receptor, beta chain                       | 9.77  | 0.0033 | IL2 receptor subunit   |
| <i>Il6ra</i>    | interleukin 6 receptor, alpha                            | 9.72  | 0.0206 | IL6 receptor subunit   |
| <i>Il1r2</i>    | interleukin 1 receptor, type II                          | 7.37  | 0.0312 | IL1A / IL1B antagonist |

#### **Other Inflammatory Genes**

|              |                                                      |        |        |                                                 |
|--------------|------------------------------------------------------|--------|--------|-------------------------------------------------|
|              |                                                      |        |        | Th1 differentiation; anti-                      |
| <i>Spp1</i>  | secreted phosphoprotein 1                            | 162.32 | 0.0048 | apoptosis; neutrophil / mast cell migration     |
| <i>Itgb2</i> | integrin beta 2                                      | 113.49 | 0.0001 | Leukocyte adhesion / extravasation              |
| <i>Itgam</i> | integrin alpha M                                     | 24.34  | 0.0203 | CD11b antigen                                   |
| <i>Casp1</i> | caspase 1                                            | 23.31  | 0.0002 | Cell necrosis; IL-1 $\beta$ and IL-18 synthesis |
| <i>Abcf1</i> | ATP-binding cassette, sub-family F (GCN20), member 1 | 6.11   | 0.0033 | ?                                               |
| <i>Bcl6</i>  | B-cell leukemia/lymphoma 6                           | 4.85   | 0.0149 | IL-4 synthesis (B-cells)                        |

#### **B. 14 day post-ligation**

| Gene | Fold | p | Function |
|------|------|---|----------|
|------|------|---|----------|

| Symbol | Gene Name | Change<br>(LCA/RCA) | value |
|--------|-----------|---------------------|-------|
|--------|-----------|---------------------|-------|

### Chemokine Genes

|               |                                      |        |                                                                       |
|---------------|--------------------------------------|--------|-----------------------------------------------------------------------|
| <i>Ccl6</i>   | chemokine (C-C motif)<br>ligand 6    | 994.86 | 0.0480<br><b>Expressed by:</b><br>neutrophils, macs                   |
| <i>Ccl2</i>   | chemokine (C-C motif)<br>ligand 2    | 716.07 | 0.0047<br><b>Attracts:</b> monocytes,<br>memory T-cells, DCs          |
| <i>Ccl9</i>   | chemokine (C-C motif)<br>ligand 9    | 83.36  | 0.0231<br><b>Attracts:</b> CD11b <sup>+</sup><br>DCs                  |
| <i>Ccl12</i>  | chemokine (C-C motif)<br>ligand 12   | 69.38  | 0.0346<br><b>Attracts:</b> monocytes,<br>lymphocytes                  |
| <i>Ccl22</i>  | chemokine (C-C motif)<br>ligand 22   | 61.52  | 0.0004<br><b>Expressed by:</b><br>macrophages, DCs                    |
| <i>Ccl19</i>  | chemokine (C-C motif)<br>ligand 19   | 60.53  | 0.0452<br><b>Attracts:</b> B-cells,<br>CCR7 <sup>+</sup> T-cells, DCs |
| <i>Ccl4</i>   | chemokine (C-C motif)<br>ligand 4    | 57.61  | 0.0084<br><b>Attracts:</b> monocytes,<br>NK cells                     |
| <i>Ccl3</i>   | chemokine (C-C motif)<br>ligand 3    | 56.19  | 0.0281<br><b>Attracts:</b> neutrophils                                |
| <i>Ccl5</i>   | chemokine (C-C motif)<br>ligand 5    | 53.51  | 0.0086<br><b>Attracts:</b> T-cells<br><b>Activates:</b> NK cells      |
| <i>Cx3cl1</i> | chemokine (C-X3-C motif)<br>ligand 1 | 51.79  | 0.0004<br><b>Attracts:</b> T-cells,<br>monocytes, DCs                 |
| <i>Cxcl9</i>  | chemokine (C-X-C motif)<br>ligand 9  | 31.22  | 0.0148<br><b>Attracts:</b> T-cells                                    |

|              |                                    |       |        |                                                                  |
|--------------|------------------------------------|-------|--------|------------------------------------------------------------------|
| <i>Ccl17</i> | chemokine (C-C motif)<br>ligand 17 | 19.42 | 0.0057 | <b>Attracts:</b> T-cells                                         |
| <i>Ccl24</i> | chemokine (C-C motif)<br>ligand 24 | 15.87 | 0.0049 | <b>Attracts:</b><br>eosinophils, resting<br>T-cells, neutrophils |
| <i>Ccl25</i> | chemokine (C-C motif)<br>ligand 25 | 7.90  | 0.0273 | <b>Attracts:</b> T-cells,<br>macrophages, DCs                    |
| <i>Ccl1</i>  | chemokine (C-C motif)<br>ligand 1  | 5.99  | 0.0030 | <b>Attracts:</b> NK cells,<br>monocytes, immature<br>B-cells     |
| <i>Ccl20</i> | chemokine (C-C motif)<br>ligand 20 | 3.55  | 0.0259 | <b>Attracts:</b><br>lymphocytes,<br>neutrophils, DCs             |

### **Chemokine Receptor Genes**

|              |                                       |        |        |                                                  |
|--------------|---------------------------------------|--------|--------|--------------------------------------------------|
| <i>Ccr2</i>  | chemokine (C-C motif)<br>receptor 2   | 165.90 | 0.0382 | <b>Binds:</b> CCL2                               |
| <i>Ccr1</i>  | chemokine (C-C motif)<br>receptor 1   | 141.64 | 0.0224 | <b>Binds:</b> CCL3, CCL5,<br>CCL7, CCL23         |
| <i>Cxcr3</i> | chemokine (C-X-C motif)<br>receptor 3 | 39.99  | 0.0371 | <b>Binds:</b> CXCL9,<br>CXCL10, CXCL11,<br>CXCL4 |
| <i>Ccr6</i>  | chemokine (C-C motif)<br>receptor 6   | 30.28  | 0.0029 | <b>Binds:</b> CCL20                              |
| <i>Ccr7</i>  | chemokine (C-C motif)<br>receptor 7   | 24.69  | 0.0053 | <b>Binds:</b> CCL19                              |

|              |                                       |       |        |                                                    |
|--------------|---------------------------------------|-------|--------|----------------------------------------------------|
| <i>Ccr10</i> | chemokine (C-C motif)<br>receptor 10  | 12.72 | 0.0126 | <b>Binds:</b> CCL27                                |
| <i>Cxcr5</i> | chemokine (C-X-C motif)<br>receptor 5 | 11.48 | 0.0453 | <b>Binds:</b> CXCL13                               |
| <i>Ccr4</i>  | chemokine (C-C motif)<br>receptor 4   | 7.10  | 0.0217 | <b>Binds:</b> CCL2, CCL4,<br>CCL5, CCL17,<br>CCL22 |

### **Cytokine Genes**

|              |                                                                                   |        |        |                                                                                 |
|--------------|-----------------------------------------------------------------------------------|--------|--------|---------------------------------------------------------------------------------|
| <i>Tgfb1</i> | transforming growth factor,<br>beta 1                                             | 276.70 | 0.0106 | Anti-inflammatory<br><br>NK cell activation /                                   |
| <i>Il15</i>  | interleukin 15                                                                    | 73.47  | 0.0151 | proliferation;<br><br>homeostatic                                               |
| <i>Il1b</i>  | interleukin 1 beta                                                                | 56.06  | 0.0384 | Pro-inflammatory<br><br>T-cell activation                                       |
| <i>Il16</i>  | interleukin 16                                                                    | 50.28  | 0.0334 | <b>Attracts:</b> activated<br>CD4 <sup>+</sup> T-cells, CD4 <sup>+</sup><br>DCs |
| <i>Aimp1</i> | aminoacyl tRNA<br>synthetase complex-<br>interacting multifunctional<br>protein 1 | 44.77  | 0.0267 | Pro-inflammatory                                                                |
| <i>Il1f6</i> | interleukin 1 family,<br>member 6                                                 | 24.51  | 0.0046 | ?                                                                               |
| <i>Il18</i>  | interleukin 18                                                                    | 22.96  | 0.0247 | Pro-inflammatory                                                                |

|              |                                   |       |        |                                            |
|--------------|-----------------------------------|-------|--------|--------------------------------------------|
| <i>Il4</i>   | interleukin 4                     | 21.73 | 0.0103 | Th2 T-cell<br>differentiation              |
| <i>Il1f8</i> | interleukin 1 family,<br>member 8 | 20.08 | 0.0037 | ?                                          |
| <i>Il17b</i> | interleukin 17B                   | 17.83 | 0.0087 | Pro-inflammatory                           |
| <i>Ltb</i>   | lymphotoxin B                     | 17.58 | 0.0210 | Pro-inflammatory                           |
| <i>Il13</i>  | interleukin 13                    | 15.74 | 0.0016 | Allergic inflammation                      |
| <i>Il11</i>  | interleukin 11                    | 6.09  | 0.0498 | Platelet production;<br>lymphopoeisis      |
| <i>Il3</i>   | interleukin 3                     | 4.50  | 0.0401 | Myeloid progenitor<br>cell differentiation |

### **Cytokine Receptor Genes**

|                |                                        |        |        |                                                                                      |
|----------------|----------------------------------------|--------|--------|--------------------------------------------------------------------------------------|
| <i>Il2rg</i>   | interleukin 2 receptor,<br>gamma chain | 456.61 | 0.0252 | Common $\gamma$ -chain<br>subunit for IL2, IL4,<br>IL7, IL9, IL15, IL21<br>receptors |
| <i>Il13ra1</i> | interleukin 13 receptor,<br>alpha 1    | 292.70 | 0.0157 | Common subunit for<br>IL13 and IL4<br>receptors                                      |
| <i>Il10ra</i>  | interleukin 10 receptor,<br>alpha      | 290.38 | 0.0150 | Subunit of IL10<br>receptor                                                          |
| <i>Il10rb</i>  | interleukin 10 receptor,<br>beta       | 172.21 | 0.0093 | Subunit of IL10<br>receptor                                                          |
| <i>Il6st</i>   | interleukin 6 signal<br>transducer     | 111.75 | 0.0202 |                                                                                      |

|              |                                                       |       |        |                      |
|--------------|-------------------------------------------------------|-------|--------|----------------------|
| <i>Il1r1</i> | interleukin 1 receptor, type I                        | 98.54 | 0.0346 |                      |
|              | tumor necrosis factor receptor superfamily, member 1a | 87.87 | 0.0309 | TNF receptor         |
| <i>Il2rb</i> | interleukin 2 receptor, beta chain                    | 55.44 | 0.0049 | IL2 receptor subunit |
| <i>Il6ra</i> | interleukin 6 receptor, alpha                         | 39.71 | 0.0011 | IL6 receptor subunit |

### **Other Inflammatory Genes**

|               |                                                      |          |        |                                                                             |
|---------------|------------------------------------------------------|----------|--------|-----------------------------------------------------------------------------|
| <i>Spp1</i>   | secreted phosphoprotein 1                            | 15057.95 | 0.0258 | Th1 differentiation;<br>anti-apoptosis;<br>neutrophil / mast cell migration |
| <i>Itgb2</i>  | integrin beta 2                                      | 958.06   | 0.0288 | Leukocyte adhesion / extravasation                                          |
| <i>Casp1</i>  | caspase 1                                            | 128.06   | 0.0185 | Cell necrosis; IL-1 $\beta$ and IL-18 synthesis                             |
| <i>Abcf1</i>  | ATP-binding cassette, sub-family F (GCN20), member 1 | 28.73    | 0.0113 | ?                                                                           |
| <i>Bcl6</i>   | B-cell leukemia/lymphoma 6                           | 14.13    | 0.0146 | IL-4 synthesis (B-cells)                                                    |
| <i>Tollip</i> | toll interacting protein                             | 11.45    | 0.0141 | Inhibits TLR signaling                                                      |

Supplemental Figure I.

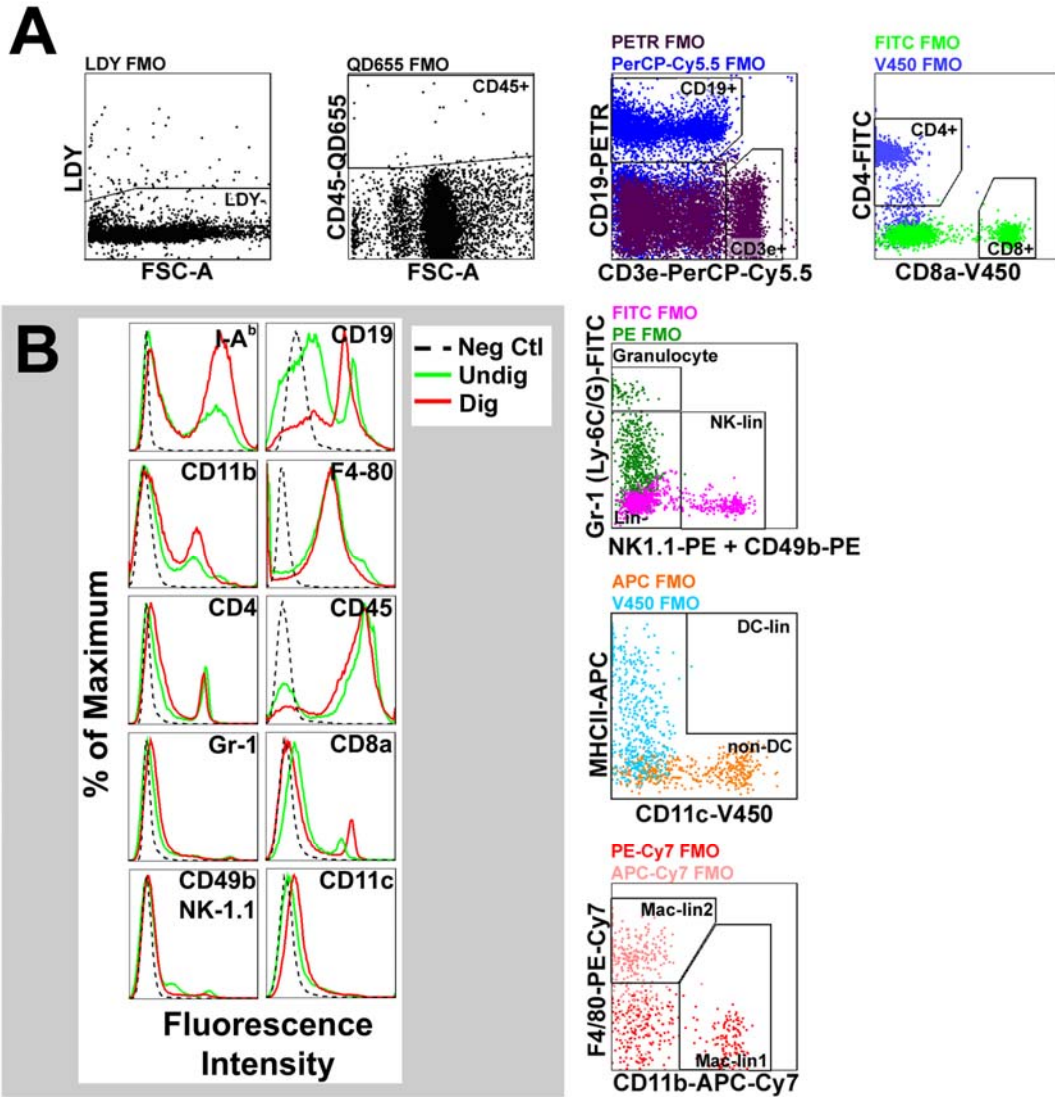

**Supplemental Figure I. Fluorescence minus one gating controls and single-color stain controls for 13-parameter flow cytometry method.**

*A*, Fluorescence minus one (FMO) control staining was performed on digested C57/Bl6 splenocytes in order to determine appropriate gate assignments for the 13-parameter flow cytometry method. Dot plots above show FMO samples and gate assignments for each step of the gating strategy (Fig. 1D). The displayed antibody/fluorochrome conjugates are identified at the left and bottom of each plot. Excluded fluorochromes are listed at the top of each plot. For bivariate plots of multiple fluorochromes, excluded fluorochromes labels are color-coded to match their corresponding dot plots. *B*, Single-color stain controls were performed on enzymatically digested (red histograms) and undigested (green histograms) splenocytes. Dotted black histograms denote unstained negative controls. In (A), FSC-A, forward scatter area; LDY, Live/Dead Yellow stain; QD655, Quantum Dot 655; PETR, PE-Texas Red.



Supplemental Figure II.

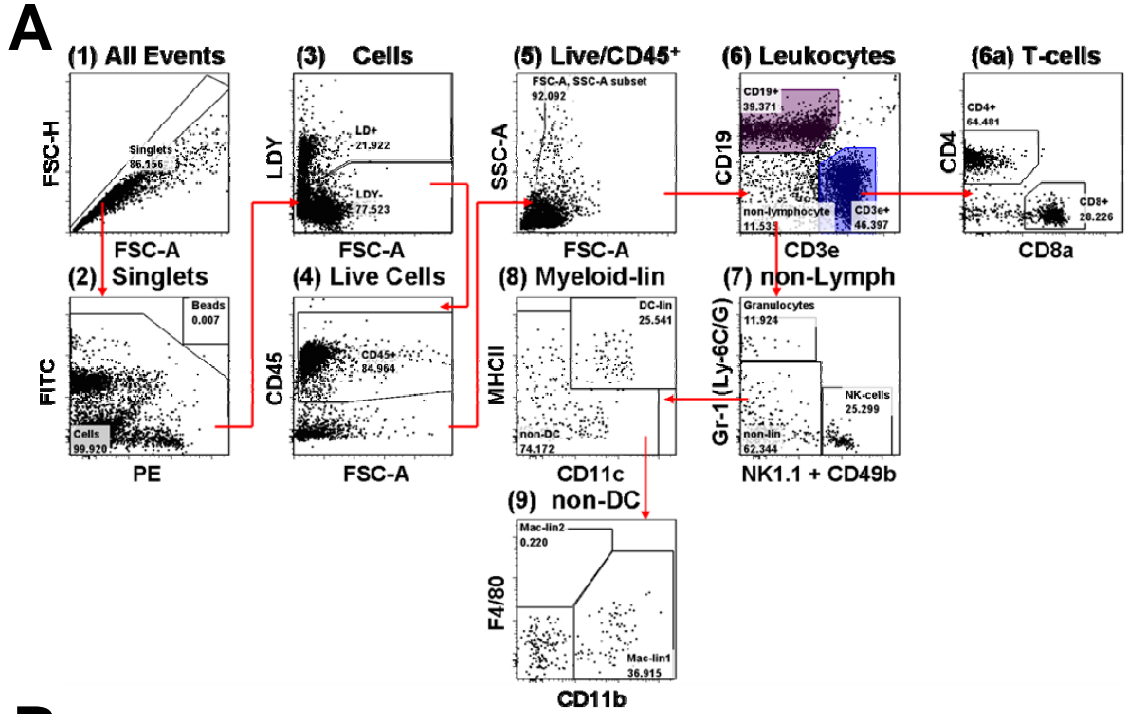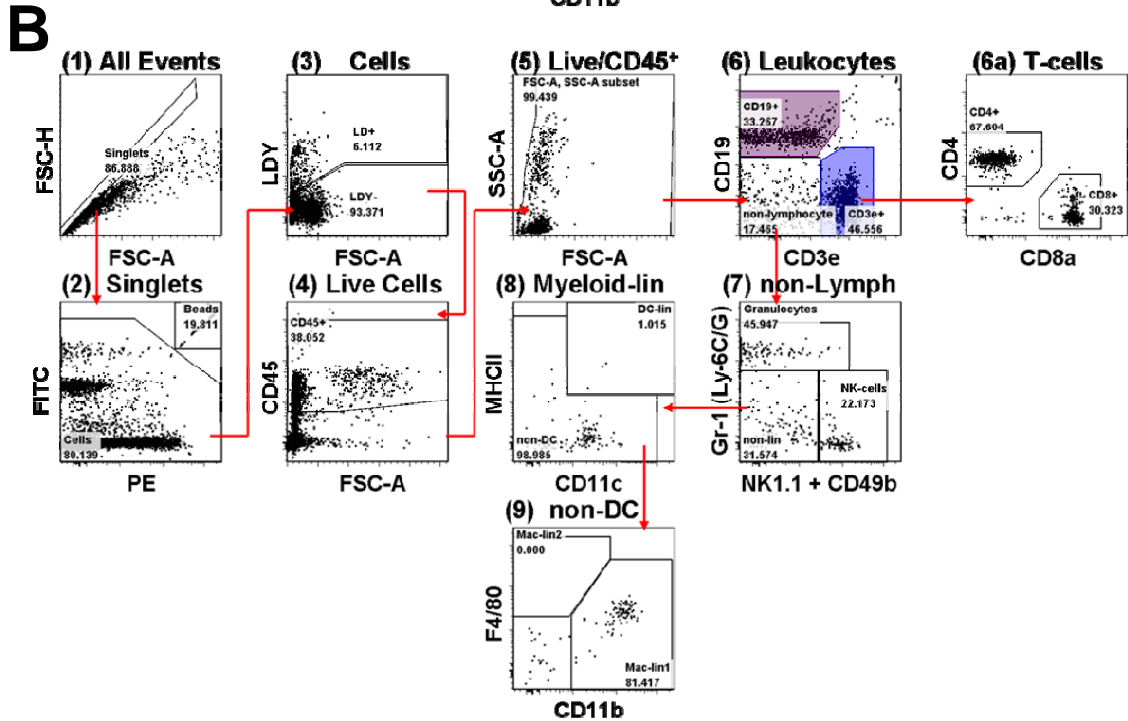

**Supplemental Figure II. Thirteen-parameter, 10-channel flow cytometry staining in splenocytes and peripheral blood leukocytes.** Splenocytes and peripheral blood leukocytes (PBL) were harvested from untreated 8wk-old male ApoE<sup>-/-</sup> mice and phenotyped using the 13-parameter flow cytometry method. *A*, Splenocytes were harvested by forcing spleen tissue through a 100 µm filter. Shown is a representative staining of undigested splenocytes. *B*, PBL were drawn by puncture of the descending aorta. Shown is a representative staining. Dot plots show appropriate leukocyte composition for both tissue compartments including increased DC (CD11c<sup>+</sup>MHCII<sup>+</sup>) levels in spleen compared with blood, and increased granulocyte (Ly6-C/G<sup>hi</sup>) levels in the blood. Numbers indicate percent of parent. FSC-H, forward scatter height; FSC-A forward scatter area; SSC-A, side scatter area; LDY, Live/Dead Yellow stain.

Supplemental Figure III.

### Gated on Leukocytes (CD45<sup>+</sup>)

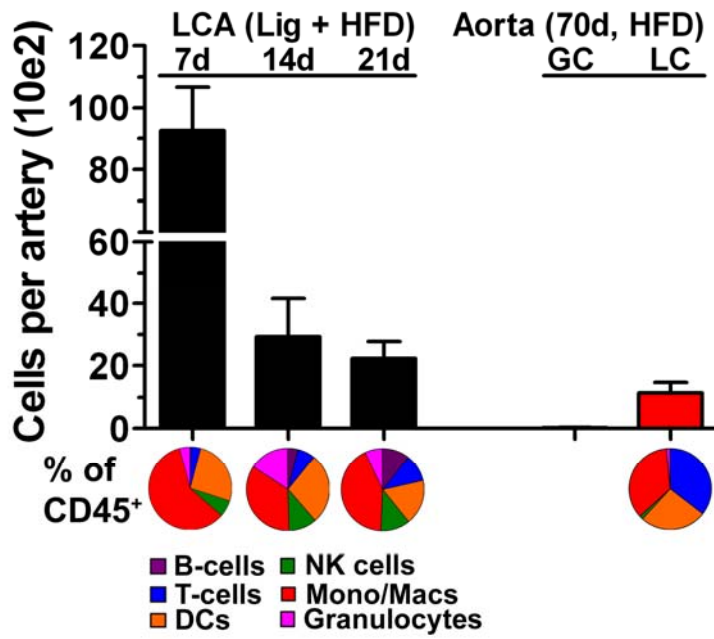

**Supplemental Figure III. Comparison of carotid and aortic lesions using the 13-parameter flow cytometry method.** Leukocyte preparations from LCA taken 7, 14, 21, and 28 days post-ligation were compared with aortic leukocyte preparations from ApoE<sup>-/-</sup> mice fed a high-fat diet (HFD) for 70 days (10 weeks), in which athero-resistant aortic greater curvature (GC) and atheroprone lesser curvature (LC) were excised, pooled (n=3), and digested independently. Graph depicts absolute leukocyte numbers per artery. Pie charts below graph depict compositional analyses of total leukocyte data. n=4 for LCA samples; n=2 for aortic samples.

Supplemental Figure IV.

# A Gating Strategy

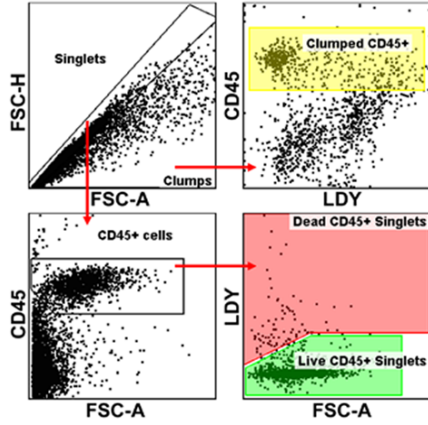

# B CD45+ Event Exclusion

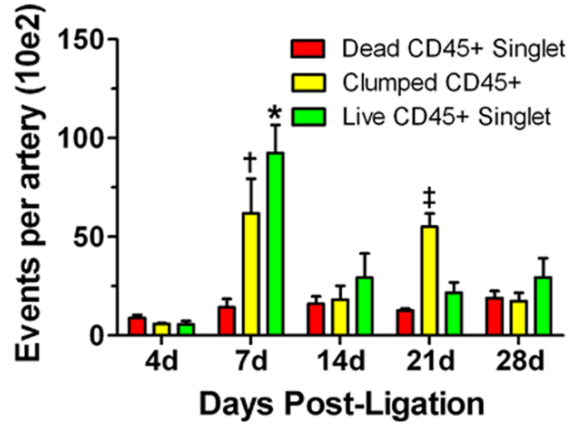

**Supplemental Figure IV. Sample quality and leukocyte viability remain fairly consistent between cell preparations from early and developed plaques.** *A*, The flow cytometry data from Figure 2A was further analyzed as shown in a representative gating scheme. *B*, The number of non-viable (CD45<sup>+</sup>LDY<sup>+</sup>; red bars) and non-singlet, or “clumped” (yellow bars) vascular leukocytes from LCA were quantified and compared against live CD45<sup>+</sup> singlets (green bars). Data are mean values ±SEM. In (B), \*, p<0.05, 7d versus 4d, 14d, 21d, and 28d; †, p<0.05 versus 4d, 14d, and 28d; ‡, p<0.05 versus 4d.

# Supplemental Figure V.

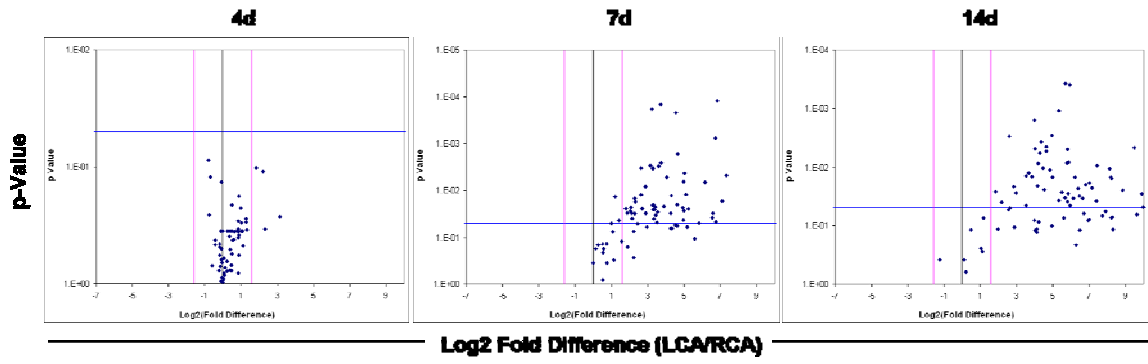

**Supplemental Figure V. Cytokine and chemokine gene expression is upregulated by disturbed flow in partially-ligated LCA.** Total RNAs obtained from LCA and RCA at 4 (n=4), 7 (n=4), or 14 (n=3) days post-ligation in ApoE<sup>-/-</sup> mice fed the HFD were analyzed by PCR cytokine arrays (shown in Fig. 5A). Shown are volcano plots depicting significant increases in cytokine and chemokine gene expression in flow-disturbed LCA compared to contralateral RCA. Red lines denote significant thresholds for magnitude of fold changes ( $-3 \geq x \geq 3$ ); blue lines denote significance threshold ( $p < 0.05$ ) for Student t-tests; each blue dot represents mean fold change in the expression of one gene.



Supplemental Figure VI.

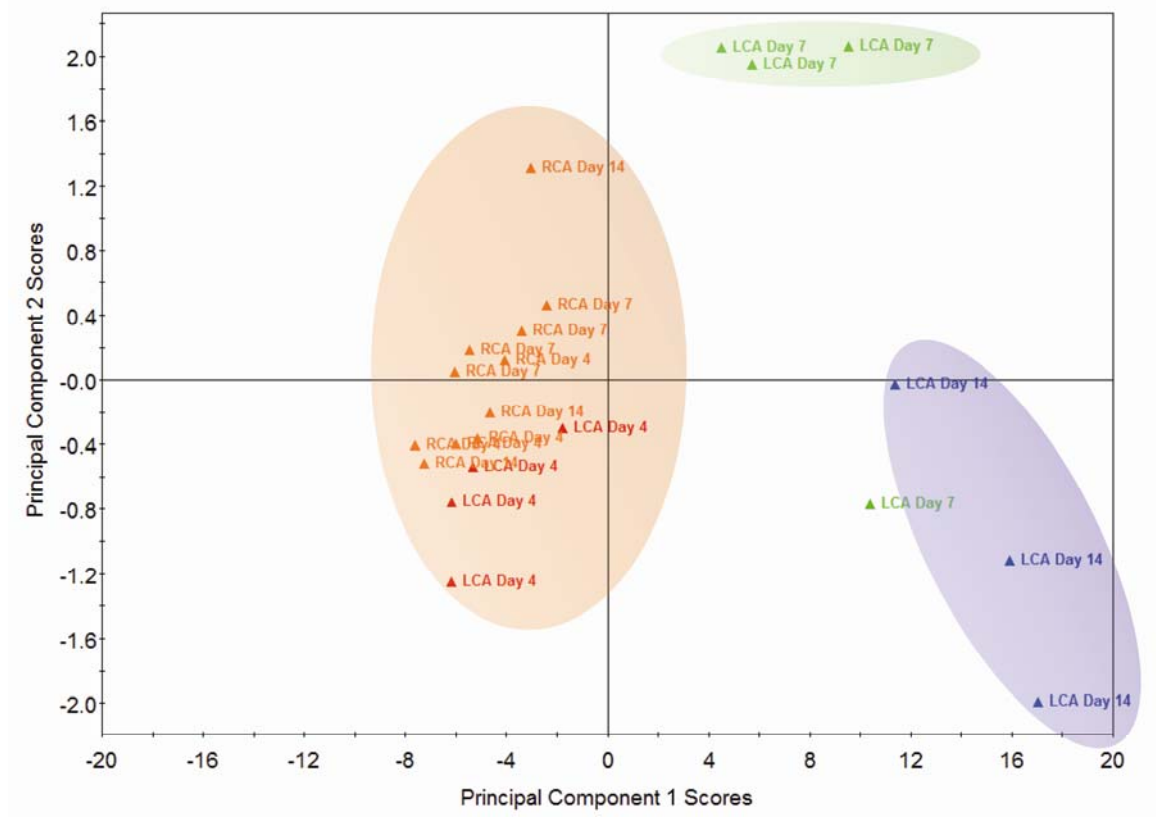

**Supplemental Figure VI. PLSR modeling distinguishes time sensitive changes in cytokine and chemokine gene expression following partial carotid ligation.** The scores plot of the contributions of individual LCA and RCA samples to the trained model separates time and flow conditions that induce expression of inflammatory cytokines from those that do not. Plot shows relatively uninflamed samples, LCA samples at 4 days post-ligation (red symbols) and RCA samples at any time point (orange symbols), versus samples showing a progressive increase in inflammation; LCA at 7 days post-ligation (green symbols) and LCA at 14 days post-ligation (blue symbols). Samples grouped by similar gene expression profiles are depicted by colored ovals.

Supplemental Figure VII.

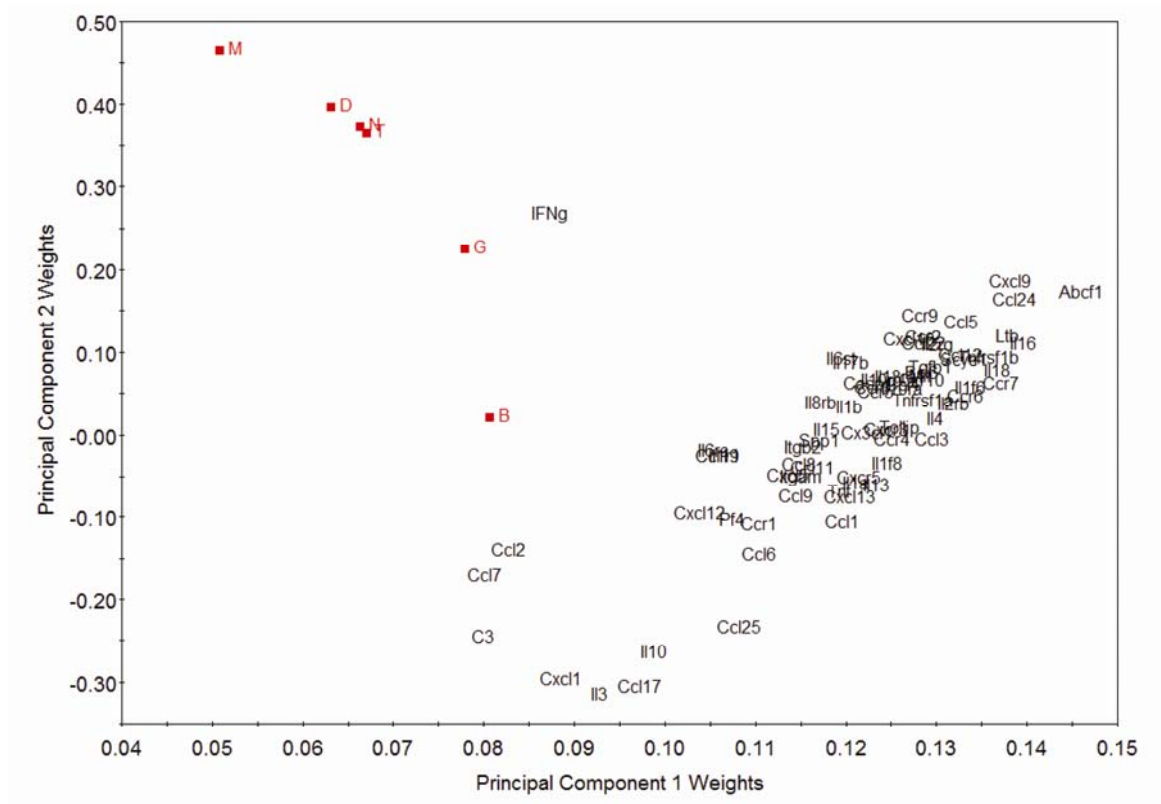

**Supplemental Figure VII. PLSR modeling links IFN $\gamma$  expression with increased leukocyte accumulation in flow-disturbed arterial wall at 7 days, preceding increased inflammation and plaque growth at 14 days post-ligation.** The loading scatterplot of weights projects arterial wall leukocyte numbers from the flow cytometry experiments (red squares) on the same plot as changes in cytokine and chemokine expression from the qPCR array data set (black). Data from our PCR primer set for IFN $\gamma$  has been substituted for the original array data. B, B-cells; T, T-cells, D, DCs, N, NK cells, M, monocyte/macrophages; G, granulocytes.

## References

1. Nam D, Ni CW, Rezvan A, Suo J, Budzyn K, Llanos A, Harrison DG, Giddens DP, Jo H. A model of disturbed flow-induced atherosclerosis in mouse carotid artery by partial ligation and a simple method of RNA isolation from carotid endothelium. *J Vis Exp*. 2010
2. Nam D, Ni CW, Rezvan A, Suo J, Budzyn K, Llanos A, Harrison D, Giddens D, Jo H. Partial carotid ligation is a model of acutely induced disturbed flow, leading to rapid endothelial dysfunction and atherosclerosis. *Am J Physiol Heart Circ Physiol*. 2009;297:H1535-1543
3. Paigen B, Morrow A, Holmes PA, Mitchell D, Williams RA. Quantitative assessment of atherosclerotic lesions in mice. *Atherosclerosis*. 1987;68:231-240
4. Galkina E, Kadl A, Sanders J, Varughese D, Sarembock IJ, Ley K. Lymphocyte recruitment into the aortic wall before and during development of atherosclerosis is partially L-selectin dependent. *J Exp Med*. 2006;203:1273-1282
5. Perfetto SP, Ambrozak D, Nguyen R, Chattopadhyay P, Roederer M. Quality assurance for polychromatic flow cytometry. *Nat Protoc*. 2006;1:1522-1530
6. Roederer M. Multiparameter facs analysis. *Curr Protoc Immunol*. 2002;Chapter 5:Unit 5 8
7. Roederer M. Compensation in flow cytometry. *Curr Protoc Cytom*. 2002;Chapter 1:Unit 1 14
8. Li L, Chen W, Rezvan A, Jo H, Harrison DG. Tetrahydrobiopterin deficiency and nitric oxide synthase uncoupling contribute to atherosclerosis induced by disturbed flow. *Arterioscler Thromb Vasc Biol*. 2011
9. Kemp ML, Wille L, Lewis CL, Nicholson LB, Lauffenburger DA. Quantitative network signal combinations downstream of TCR activation can predict IL-2 production response. *J Immunol*. 2007;178:4984-4992

10. Miller-Jensen K, Janes KA, Brugge JS, Lauffenburger DA. Common effector processing mediates cell-specific responses to stimuli. *Nature*. 2007;448:604-608
11. Gaudet S, Janes KA, Albeck JG, Pace EA, Lauffenburger DA, Sorger PK. A compendium of signals and responses triggered by prodeath and prosurvival cytokines. *Mol Cell Proteomics*. 2005;4:1569-1590
12. Janes KA, Albeck JG, Gaudet S, Sorger PK, Lauffenburger DA, Yaffe MB. A systems model of signaling identifies a molecular basis set for cytokine-induced apoptosis. *Science*. 2005;310:1646-1653
13. Janes KA, Kelly JR, Gaudet S, Albeck JG, Sorger PK, Lauffenburger DA. Cue-signal-response analysis of TNF-induced apoptosis by partial least squares regression of dynamic multivariate data. *J Comput Biol*. 2004;11:544-561
14. Rivet CA, Hill AS, Lu H, Kemp ML. Predicting cytotoxic T-cell age from multivariate analysis of static and dynamic biomarkers. *Mol Cell Proteomics*. 2011;10:M110 003921
